# Supplementary material
Source: PubMed Central journal article supplement (PMC1317962)

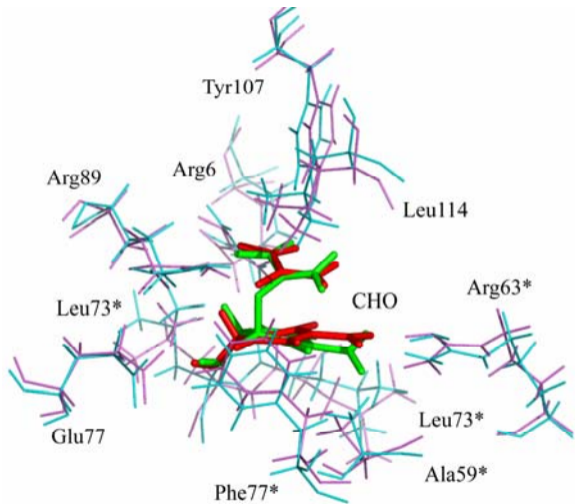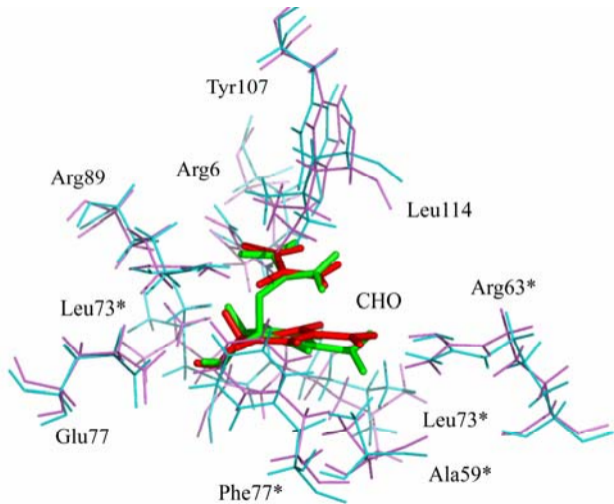

Supplement: pnas_0509234102_1.pdf [file pnas_0509234102_1.pdf]

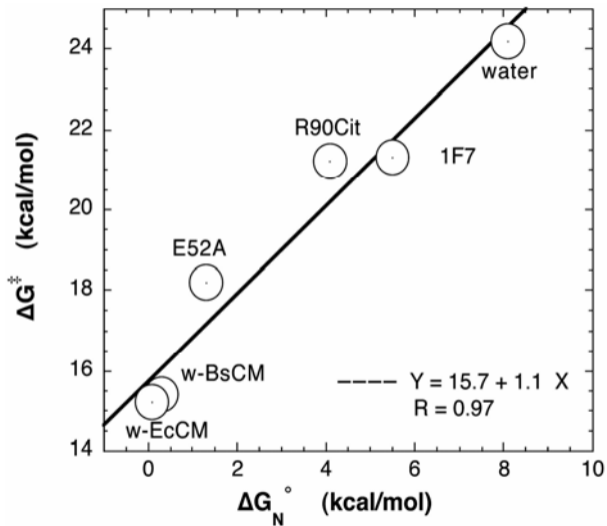

Supplement: pnas_0509234102_2.pdf [file pnas_0509234102_2.pdf]
